# Supplementary material for: Highly uniform indicator-mediated SERS sensor platform for the detection of Zn2+
Source: Royal Society of Chemistry journal article supplement (doi:10.1039/c5ra28041a), 2016-01-01
Supplement: c5ra28041a1.pdf [file c5ra28041a1.pdf]

## Supplementary Information

### Highly uniform indicator-mediated SERS sensor platform for the detection of $\text{Zn}^{2+}$

Liangliang Jin,<sup>a,b</sup> Guangwei She,<sup>\*a</sup> Lixuan Mu<sup>a</sup> and Wensheng Shi<sup>a</sup>

<sup>a</sup> Key Laboratory of Photochemical Conversion and Optoelectronic Materials, Technical Institute of Physics and Chemistry, Chinese Academy of Sciences, Beijing 100190, China

<sup>b</sup> University of Chinese Academy of Sciences, Beijing 100049, China

\*Corresponding author: Guangwei She,

Tel: 86-10-82543788. Fax: 86-10-82543513.

Email: [shegw@mail.ipc.ac.cn](mailto:shegw@mail.ipc.ac.cn)

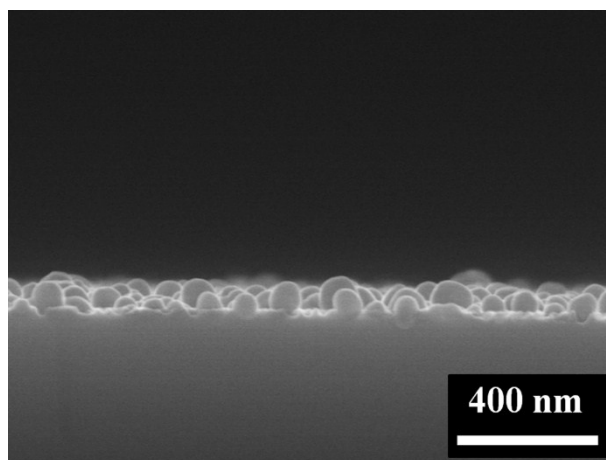

Fig. S1 SEM image of the side view of AgNP-Si substrate.

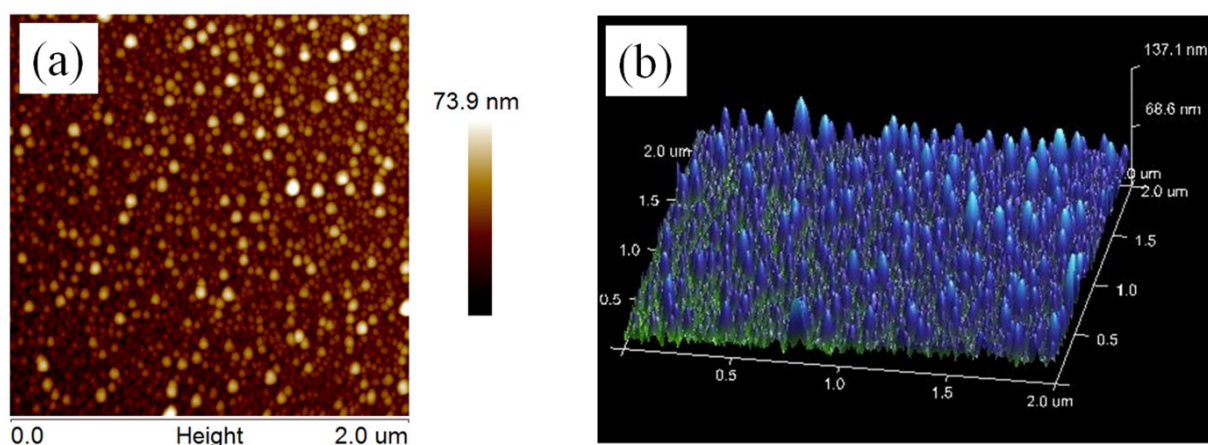

Fig. S2 AFM 2D and 3D images (a and b) of AgNP-Si substrate

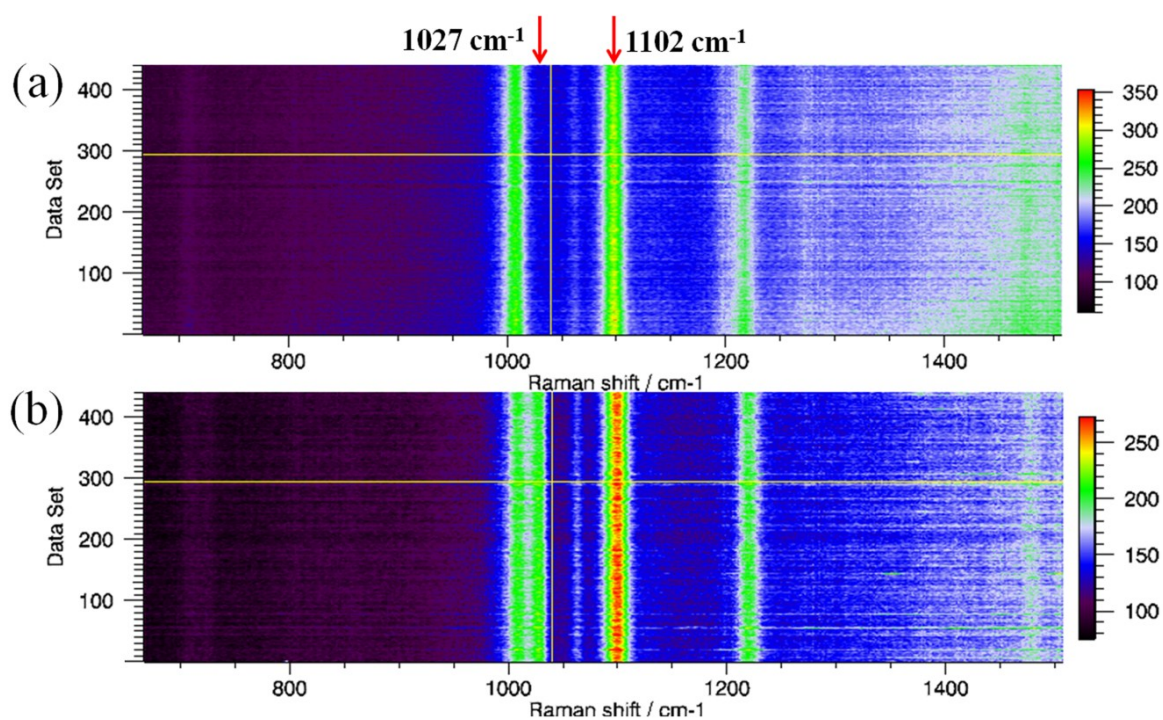

Fig. S3 SERS spectra of 4-MPY form 441 points on the AgNP-Si substrate (a), SERS spectra of 4-MPY form 441 points on the sensor to detect 10 mM  $\text{Zn}^{2+}$  (b).

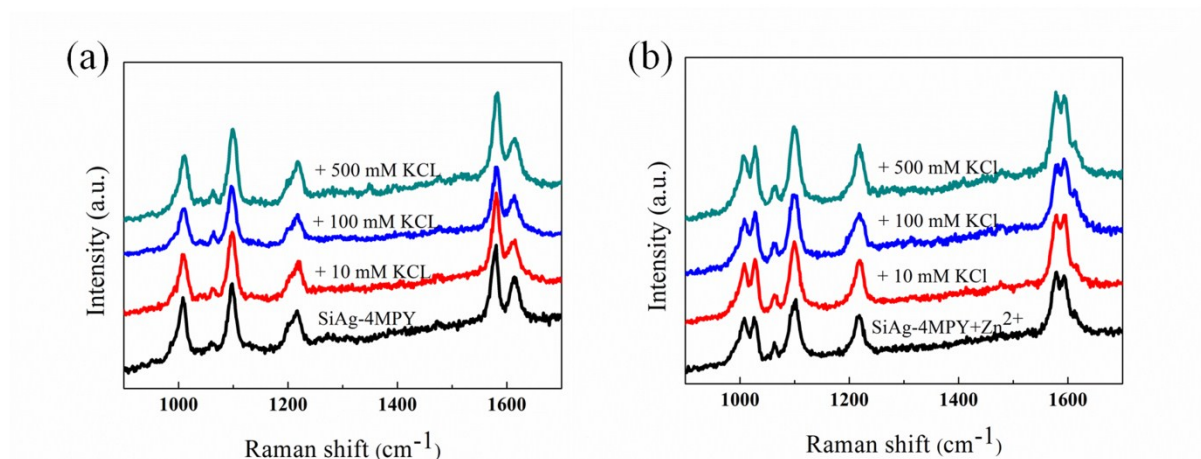

Fig. S4 (a) SERS spectra of SiAg-4MPY treated with KCl solution of different concentrations (10-500 mM). (b) SERS detection of  $\text{Zn}^{2+}$  (10mM) in the presence of different amounts of KCl (10-500 mM).

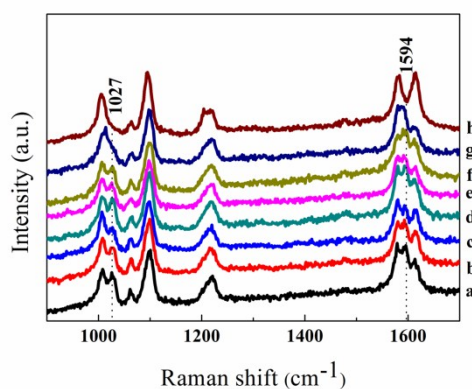

Fig. S5 SERS spectra response of SiAg-4MPY in the presence of  $\text{Zn}^{2+}$  (10mM, curve a) and interfering ions,  $\text{Mn}^{2+}$  (curve b),  $\text{Ca}^{2+}$  (curve c),  $\text{K}^{+}$  (curve d),  $\text{Ni}^{2+}$  (curve e),  $\text{Fe}^{2+}$  (curve f),  $\text{Cd}^{2+}$  (curve g) and  $\text{Cr}^{3+}$  (curve h)

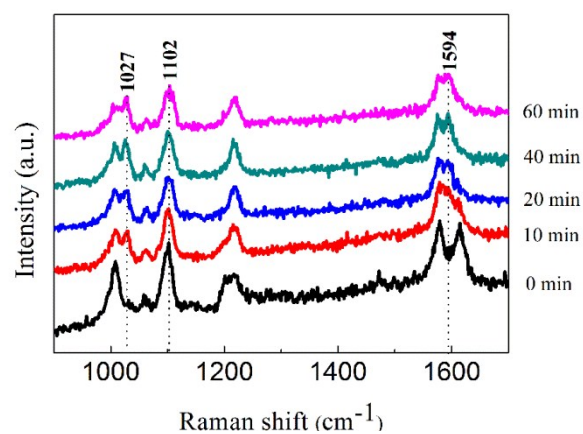

Fig. S6 SERS spectra of SiAg-4MPY used to detect 10 mM  $\text{Zn}^{2+}$  with different immersing times.

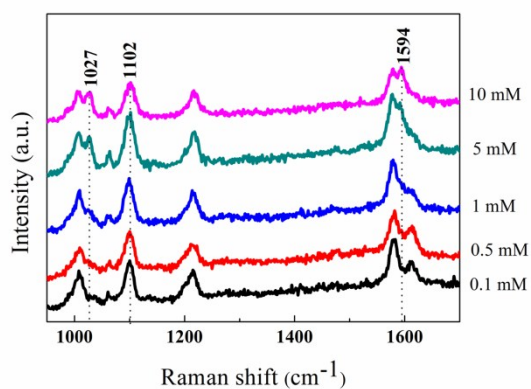

Fig. S7 SERS spectra of SiAg-4MPY used to detect  $\text{Zn}^{2+}$  at different concentrations.

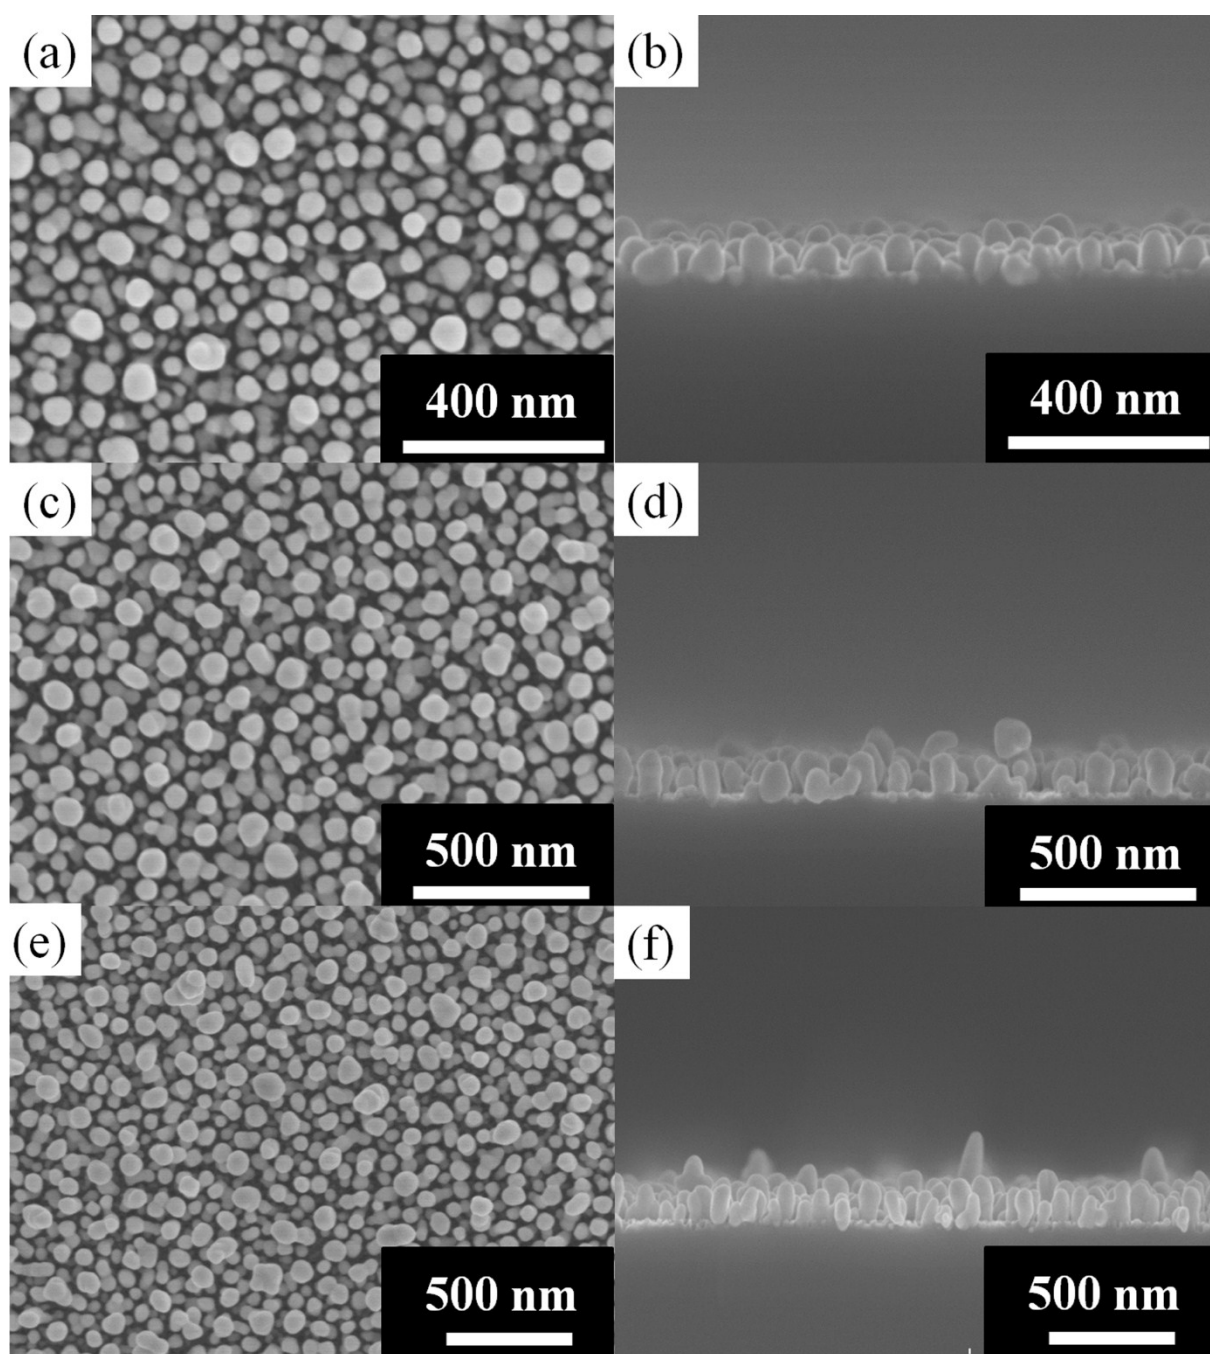

Fig. S8 SEM images of as-optimized AgNP-Si substrate, the immersing times are 60s (a, b), 180s (c, d), 300s (e, f).

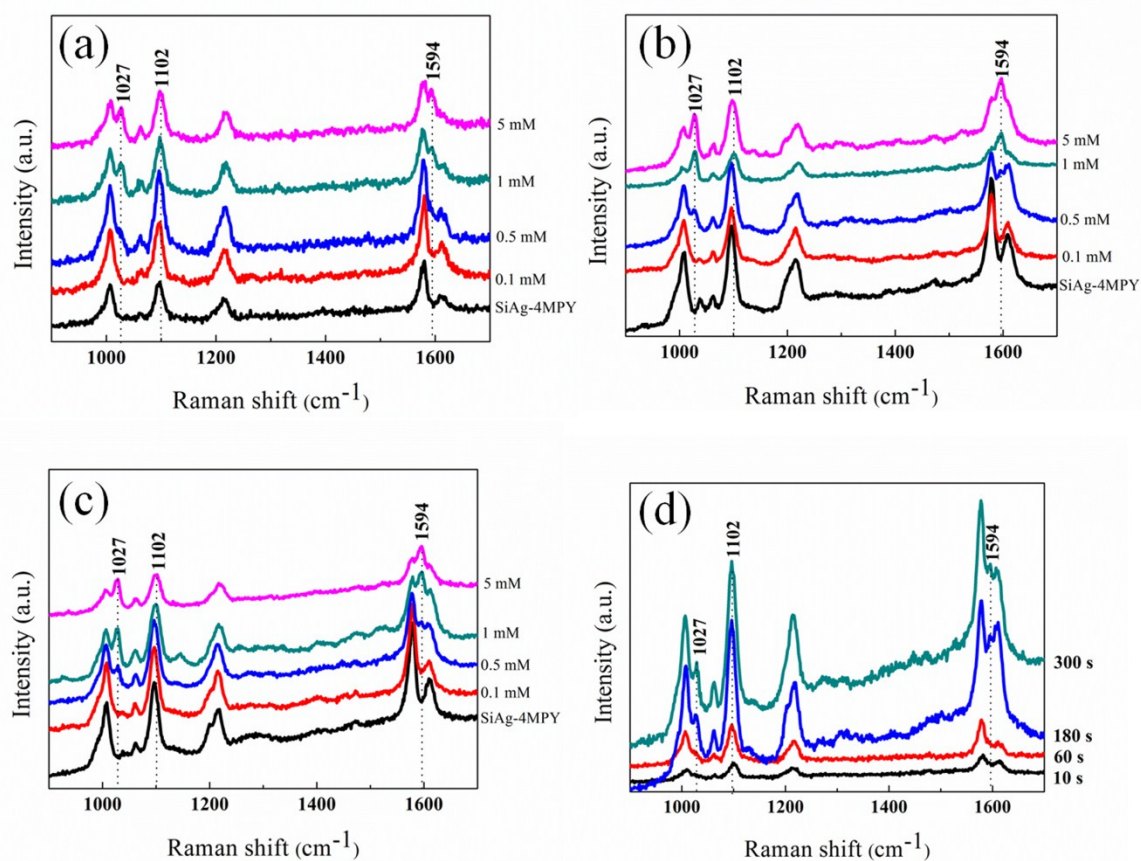

Fig. S9 SERS spectra of SiAg-4MPY alone and SiAg-4MPY used to detect Zn<sup>2+</sup> with different optimizing time, 60s (a), 180s (b), 300s (c), and SERS spectra of SiAg-4MPY used to detect Zn<sup>2+</sup> at the concentration of 0.5 mM (d).
